# Supplementary material for: 18β-Glycyrrhetinic Acid Induces Metabolic Changes and Reduces Staphylococcus aureus Bacterial Cell-to-Cell Interactions
Source: MDPI journal article supplement (doi:10.3390/antibiotics11060781), 2022-06-08
Supplement: s1 [file s1]

**Supplementary Figure S1:** Hierarchical clustering analysis (HCA) and heatmap visualization of intracellular metabolite levels in the GRA-treated (orange) compared to the control (purple) MRSA cell cultures, with all metabolites identified and quantified displayed.

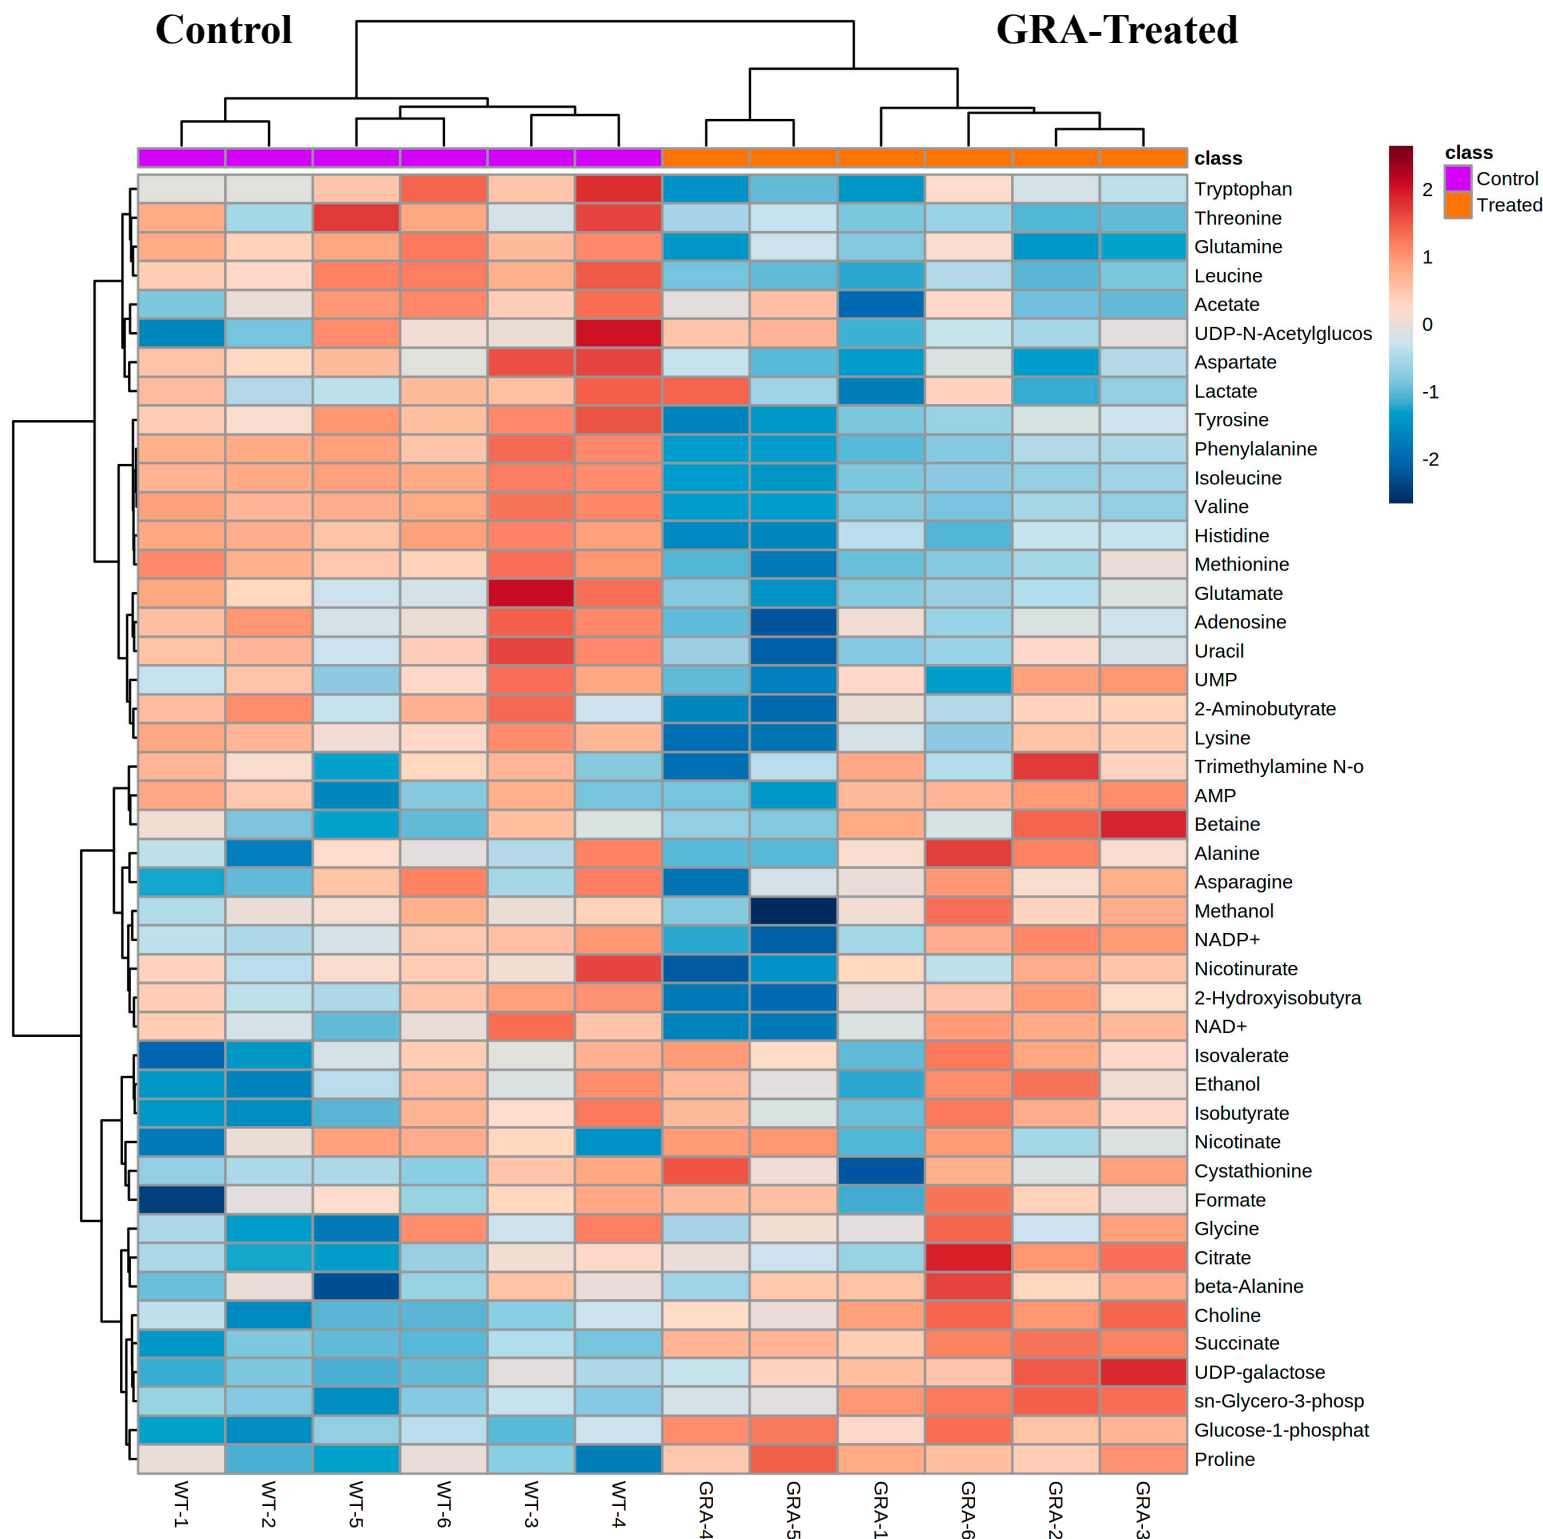

**Supplementary Table S1:** List of intracellular metabolites and mean concentrations, as measured by <sup>1</sup>H NMR, for the GRA-treated and control *S. aureus* cell cultures; Metabolite concentrations are reported as the mean concentration  $\pm$  one standard deviation [( $\mu$ moles/CFU)\*10<sup>-14</sup>].

|                             | Control |           | GRA Treated |           |
|-----------------------------|---------|-----------|-------------|-----------|
|                             | Mean    | Std. Dev. | Mean        | Std. Dev. |
| 2-Aminobutyrate             | 15.28   | 6.78      | 7.79        | 4.37      |
| 2-Hydroxyisobutyrate        | 3.69    | 0.38      | 3.34        | 0.63      |
| AMP                         | 6.87    | 2.37      | 7.90        | 2.59      |
| Acetate                     | 91.59   | 18.24     | 70.46       | 16.85     |
| Adenosine                   | 4.56    | 1.71      | 2.03        | 0.83      |
| Alanine                     | 50.25   | 4.27      | 52.16       | 5.26      |
| Asparagine                  | 17.96   | 3.68      | 17.76       | 3.11      |
| Aspartate                   | 375.43  | 48.23     | 283.19      | 27.98     |
| Betaine                     | 505.58  | 48.54     | 568.88      | 86.09     |
| Choline                     | 4.39    | 0.57      | 6.89        | 1.06      |
| Citrate                     | 11.67   | 1.02      | 13.60       | 1.81      |
| Cystathionine               | 14.09   | 1.64      | 15.09       | 2.96      |
| Ethanol                     | 1.76    | 0.50      | 2.07        | 0.47      |
| Formate                     | 1.42    | 0.28      | 1.58        | 0.24      |
| Glucose-1-phosphate         | 1.63    | 0.43      | 4.16        | 0.95      |
| Glutamate                   | 196.54  | 23.12     | 163.66      | 9.33      |
| Glutamine                   | 54.61   | 11.09     | 19.50       | 9.26      |
| Glycine                     | 46.60   | 7.58      | 49.56       | 5.14      |
| Histidine                   | 3.17    | 0.37      | 1.16        | 0.40      |
| Isobutyrate                 | 0.48    | 0.12      | 0.54        | 0.09      |
| Isoleucine                  | 18.43   | 1.82      | 7.45        | 1.19      |
| Isovalerate                 | 0.83    | 0.18      | 0.98        | 0.16      |
| Lactate                     | 104.05  | 19.40     | 86.04       | 26.84     |
| Leucine                     | 33.92   | 7.11      | 15.18       | 1.68      |
| Lysine                      | 12.70   | 1.43      | 9.01        | 2.85      |
| Methanol                    | 2.22    | 0.32      | 2.17        | 0.87      |
| Methionine                  | 18.84   | 2.84      | 9.57        | 2.33      |
| NAD+                        | 23.19   | 3.32      | 21.89       | 4.72      |
| NADP+                       | 2.69    | 0.29      | 2.59        | 0.58      |
| Nicotinate                  | 1.13    | 0.82      | 1.44        | 0.94      |
| Nicotinurate                | 1.11    | 0.70      | 0.72        | 0.46      |
| Phenylalanine               | 5.34    | 0.77      | 2.25        | 0.43      |
| Proline                     | 41.20   | 10.43     | 70.38       | 10.00     |
| Succinate                   | 3.71    | 0.52      | 8.36        | 1.28      |
| Threonine                   | 16.10   | 9.91      | 4.62        | 0.96      |
| Trimethylamine N-oxide      | 256.89  | 26.90     | 260.95      | 43.37     |
| Tryptophan                  | 1.56    | 0.33      | 1.09        | 0.19      |
| Tyrosine                    | 4.02    | 0.73      | 2.26        | 0.48      |
| UDP-N-Acetylglucosamine     | 2.69    | 1.93      | 1.99        | 0.70      |
| UDP-galactose               | 1.88    | 0.36      | 3.71        | 1.30      |
| UMP                         | 2.90    | 0.63      | 2.49        | 0.84      |
| Uracil                      | 2.27    | 0.50      | 1.45        | 0.35      |
| Valine                      | 31.54   | 3.34      | 13.79       | 2.05      |
| sn-Glycero-3-phosphocholine | 16.58   | 2.86      | 36.30       | 11.04     |
| beta-Alanine                | 5.89    | 1.52      | 7.94        | 1.69      |

**Supplementary Table S2. Primers & Probes for qRT-PCR.**

| <b>Primers and Probes</b> | <b>Sequence</b>                         |
|---------------------------|-----------------------------------------|
| <i>clfA</i> forward       | 5' - AGGTTCTGGTGACGGTATCGA - 3'         |
| <i>clfA</i> reverse       | 5' - TCAATTCACCAGGCTCATCAG - 3'         |
| <i>clfA</i> probe         | 5' - AAACCAGTTGTTCTGAAC - 3'            |
| <i>fnbA</i> forward       | 5' - CGTCAAACGCAACACAAGTAA - 3'         |
| <i>fnbA</i> reverse       | 5' - CGCTTCTTCCTTAACCTCTT - 3'          |
| <i>fnbA</i> probe         | 5' - AAGCACCACAACTGCACAACCAG - 3'       |
| <i>gyrB</i> forward       | 5' - CAAATGATCACAGCTTTGGTACAG - 3'      |
| <i>gyrB</i> reverse       | 5' - CGGCATCAGTCATAATGACGAT - 3'        |
| <i>gyrB</i> probe         | 5' - AATCGGTGGCGACTTTGATCTAGCGAAAG - 3' |
| <i>hla</i> forward        | 5' - CAACAACACTATTGCTAGGTTCCATATT -3'   |
| <i>hla</i> reverse        | 5' - CCTGTTTTTACTGTAGTATTGCTTCCA -3'    |
| <i>hla</i> probe          | 5' - ATGAATCCTGTCGCTAATGCCGCAGA -3'     |
| <i>nuc</i> forward        | 5' - ATATGGACGTGGCTTAGCGT - 3'          |
| <i>nuc</i> reverse        | 5' - TGAATCAGCGTTG TCTTCGCTCCA - 3'     |
| <i>nuc</i> probe          | 5' - ACGAAGCTTTAGTTCGTCAAGGCTTGGC - 3'  |
